# Supplementary material for: A method for labeling proteins with tags at the native genomic loci in budding yeast
Source: PubMed Central journal article supplement (PMC5411076; doi:10.1371/journal.pone.0176184), 2017-05-01

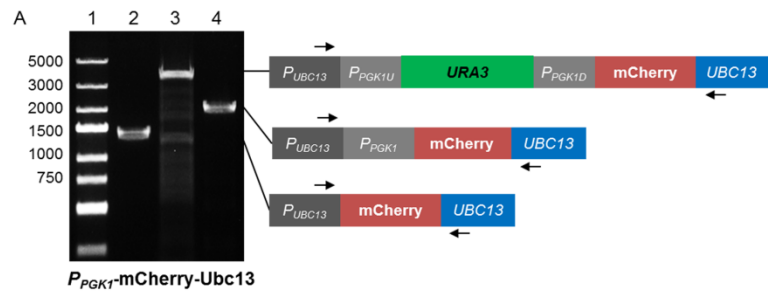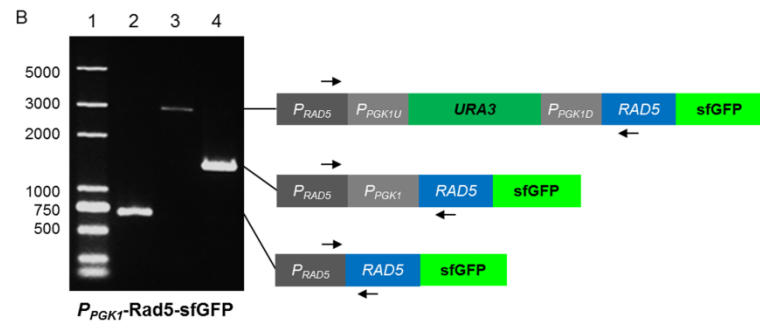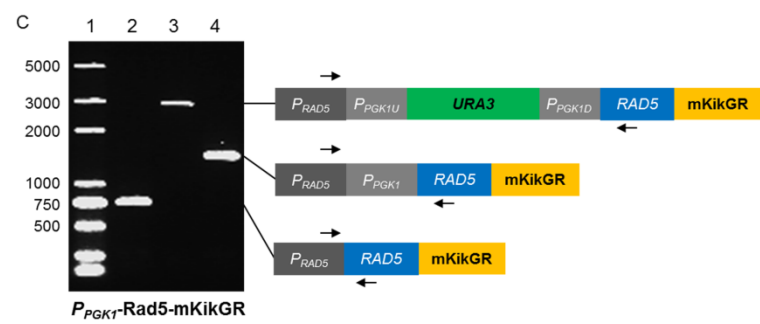

Supplement: pone.0176184.s002.pdf [file pone.0176184.s002.pdf]
