# Supplementary material for: A method for labeling proteins with tags at the native genomic loci in budding yeast
Source: PubMed Central journal article supplement (PMC5411076; doi:10.1371/journal.pone.0176184), 2017-05-01
Supplement: pone.0176184.s004.pdf [file pone.0176184.s004.pdf]

**S1 Table.** Plasmid construction primers

| <b>Plasmid construction Primers</b> | <b>Sequences (5'→3')</b>                                    |
|-------------------------------------|-------------------------------------------------------------|
| <b>PHUH</b>                         |                                                             |
| pHA-URA3 F                          | TTCCCAAGCTTATGTACCCATACGATGTTCCAGATTACGCTGGGTAATAACTGATATAA |
| pHA-URA3 R                          | CCAAGAATTCAGCGTAATCTGGAACATCGTATGGGTACATAGCTTTTCAATTCAATTC  |
| <b>pFUF</b>                         |                                                             |
| pFLAG-URA3 F                        | GATTATAAAGATCATGACATCGATTACAAGGATGACGATGACAAGGGGTAATAACT    |
| pFLAG-URA3 R                        | ATGATCTTTATAATCACCGTCATGGTCTTTGTAGTCCATAGCTTTTCAATTCAATTC   |
| pFLAG F                             | GAGCCACTCGAGATGGACTACAAAGACCATGACGGTGATTATAAAGATCATGAC      |
| pFLAG R                             | GAGCCAGGATCCCTTGTCATCGTCATCCTTGTAATCGATGTCATGATCTTTATAATC   |
| <b>pCUC</b>                         |                                                             |
| pURA3 F                             | CCAGTCAAGCTTGGGTAATAACTGATATAA                              |
| pURA3 R                             | GCCCAGGAATTCAGCTTTTCAATTCAATTC                              |
| pNmCherry F                         | GAACATCTCGAGATGGTGAGCAAGGGCGAG                              |
| pNmCherry R                         | CCAGTCAAGCTTCCTCTGCTTGATCTCGCC                              |
| pCmCherry F                         | GCCCAGGAATTCAGTTCATGTACGGCTCC                               |
| pCmCherry R                         | GTGGATGGATCCCTTGTACAGCTCGTCCAT                              |
| <b>PGFUGF</b>                       |                                                             |
| pNsfGFP F                           | CGCCCTCGAGATGCGTAAAGGCGAAGAGC                               |

---

|             |                                                   |
|-------------|---------------------------------------------------|
| pNsfGFP R   | CCGCA <u>AAGCTTTT</u> TATTACGGTTACGAACTCCAGCA     |
| pCsfGFP F   | CGCC <u>GAATTC</u> GTGTTTCAGTGCTTTGCTCGTT         |
| pCsfGFP R   | CCGCG <u>GATCCTT</u> TATTATCATCATTTGTACAGTTC      |
| <b>pKUK</b> |                                                   |
| pNmKikGR F  | CGCC <u>CTCGAGATG</u> AGTGTGATTACATCAGAAATGAAGA   |
| pNmKikGR R  | CCGCA <u>AAGCTTTT</u> TATTATTATATTGTTTGTGGCGAGGCA |
| PCmKikGR F  | CGCC <u>GAATTC</u> TGTCGAATACCCAGAAGAAATAGT       |
| PCmKikGR R  | CCGCG <u>GATCCTT</u> TATTAGGCTTCAAATTCATACTTGGCG  |

---
