# Supplementary material for: A method for labeling proteins with tags at the native genomic loci in budding yeast
Source: PubMed Central journal article supplement (PMC5411076; doi:10.1371/journal.pone.0176184), 2017-05-01
Supplement: pone.0176184.s005.pdf [file pone.0176184.s005.pdf]

**S2 Table.** Promoter exchange primers

| Promoter exchange primers | Sequences (5'→3')                                                       |
|---------------------------|-------------------------------------------------------------------------|
| pUbc13-PUP F              | <u>TTAGCAAATAAGGTCAGGTTTCATTGTAACATAGTTAGAATC</u><br>GAGGTCGACGGTATCGAT |
| pPUP- <u>mCherry</u> R    | <u>GGCCATGTTATCCTCCTCGCCCTTGCTCACCATCTCGAGTG</u><br>TTTTATATTTGTTGTA    |
| pRad5up F                 | AAACCCCTCATTCTGGACCT                                                    |
| pRad5up-PUP R             | CACTCTTTCCTTACTCAC <u>ATTGTGATACTGTAAGACTT</u>                          |
| pRad5up-PUP F             | <u>AAGTCTTACAGTATCACAATGTGAGTAAGGAAAGAGTG</u>                           |
| pPUP- <u>Rad5down</u> R   | <u>TCCTGTTCAATATGACTCATTGTTTTATATTTGTTGTA</u>                           |
| pPUP- <u>Rad5down</u> F   | TACAACAAATATAAAACA <u>ATGAGTCATATTGAACAGGA</u>                          |
| pRad5down R               | TGATTCGGGGAAGACGGTAT                                                    |
