# Supplementary material for: A method for labeling proteins with tags at the native genomic loci in budding yeast
Source: PubMed Central journal article supplement (PMC5411076; doi:10.1371/journal.pone.0176184), 2017-05-01
Supplement: pone.0176184.s006.pdf [file pone.0176184.s006.pdf]

**S3 Table.** Yeast strains check primers

| <b>Yeast strains check primers</b>   | <b>Sequences (5'→3')</b>       |
|--------------------------------------|--------------------------------|
| <b>HA-Ubc13</b>                      |                                |
| pNCHK-UH F                           | GCCGCATCCGTATTGTTACCCGAA       |
| pNCHK-UH R                           | ACGGCTCAGACGAAAACGTC           |
| pNCHK-HA R                           | AGCGTAATCTGGAACATCGTATGGGTACAT |
| <b>Ubc13-HA</b>                      |                                |
| pCCHK-UH F                           | TGGCATTACAGCAGAACCACATGA       |
| pCCHK-UH R                           | TTATGATCCGGAATTAAACG           |
| pCCHK-HA F                           | ATGTACCCATACGATGTTCCAGATTACGCT |
| <b>3xFLAG/(pPGK1-) mCherry-Ubc13</b> |                                |
| pCHKUbc13 F                          | TTGAATGCAGAACAAGAAGG           |
| pCHKUbc13 R                          | TCATATGGTGACTGTTCTGG           |
| <b>Rad5-sfGFP/mKik GR</b>            |                                |
| pCHKRad5 F                           | GGATATCCTGGAGAAAGAGC           |
| pCHKRad5 R                           | GCATTCAAAATGGATTGAAC           |
| <b>pPGK1-Rad5-sfGF P/mKikGR</b>      |                                |
| pRad5up F                            | AAACCCCTCATTCTGGACCT           |
| pRad5down R                          | TGATTCGGGGAAGACGGTAT           |
